# Supplementary material
Source: Springer Nature journal article supplement (https://www.springermedizin.de/resource/supplementary/13051_2011_198_MOESM1_ESM.pdf/9670138)

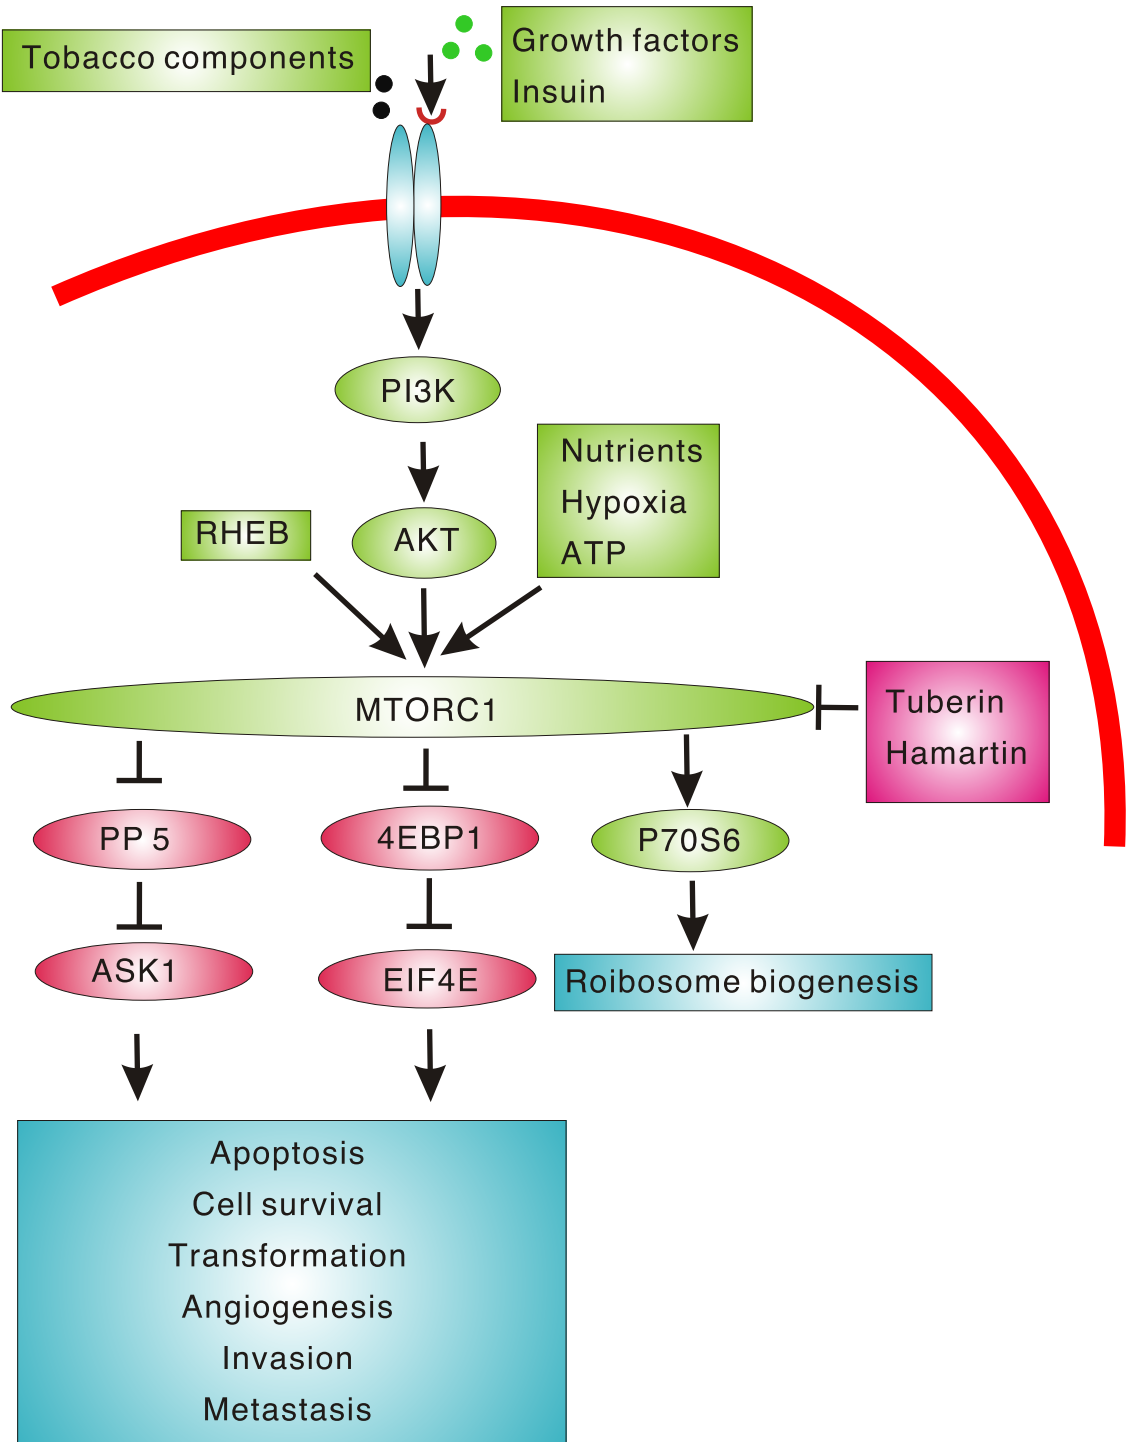

Supplement: MOESM1 [file 9670138]
